# Supplementary material for: A novel disulfidptosis-related lncRNAs signature for predicting survival and immune response in hepatocellular carcinoma
Source: publisher site journal article supplement (doi:10.18632/aging.205367), 2024-01-04
Supplement: Supplementary file [file aging-v16i1-205367-supplementary-material-SD1.pdf]

**SUPPLEMENTARY FIGURES**

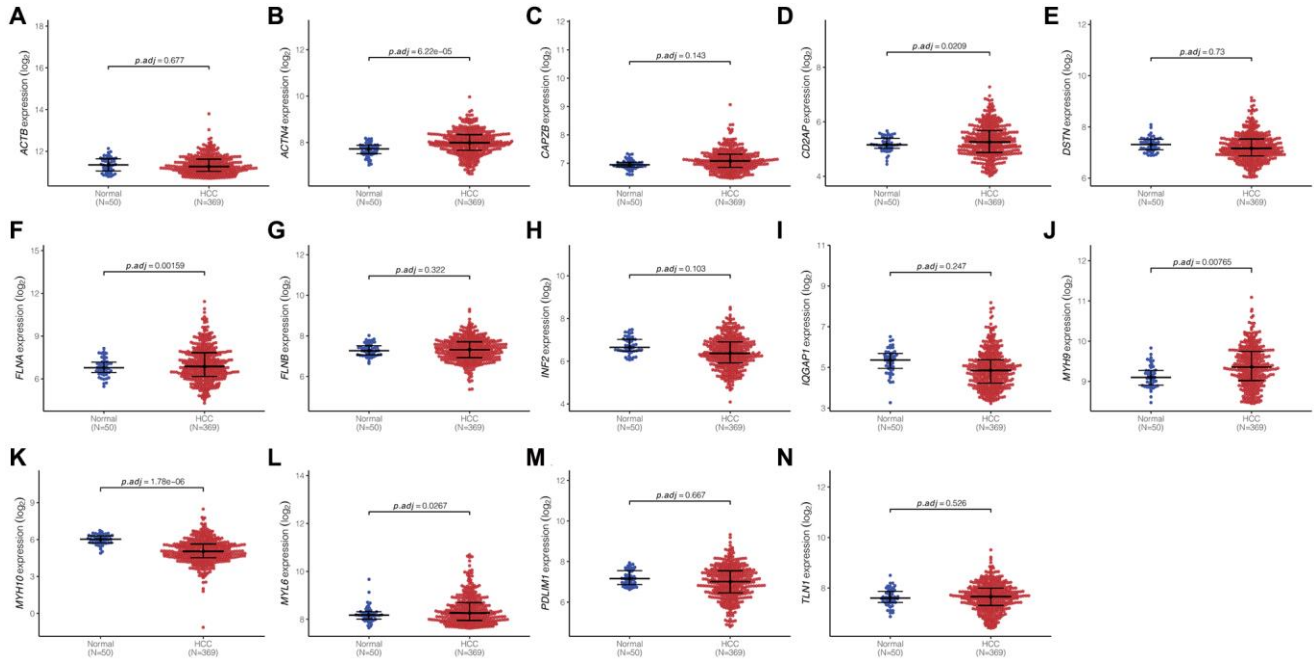

**Supplementary Figure 1.** Differential analyses of 14 DRGs in HCC, including ACTB (A), ACTN4 (B), CAPZB (C), CD2AP (D), DSTN (E), FLNA (F), FLNB (G), INF2 (H), IQGAP1 (I), MYH9 (J), MYH10 (K), MYL6 (L), PDLIM1 (M), TLN1 (N).

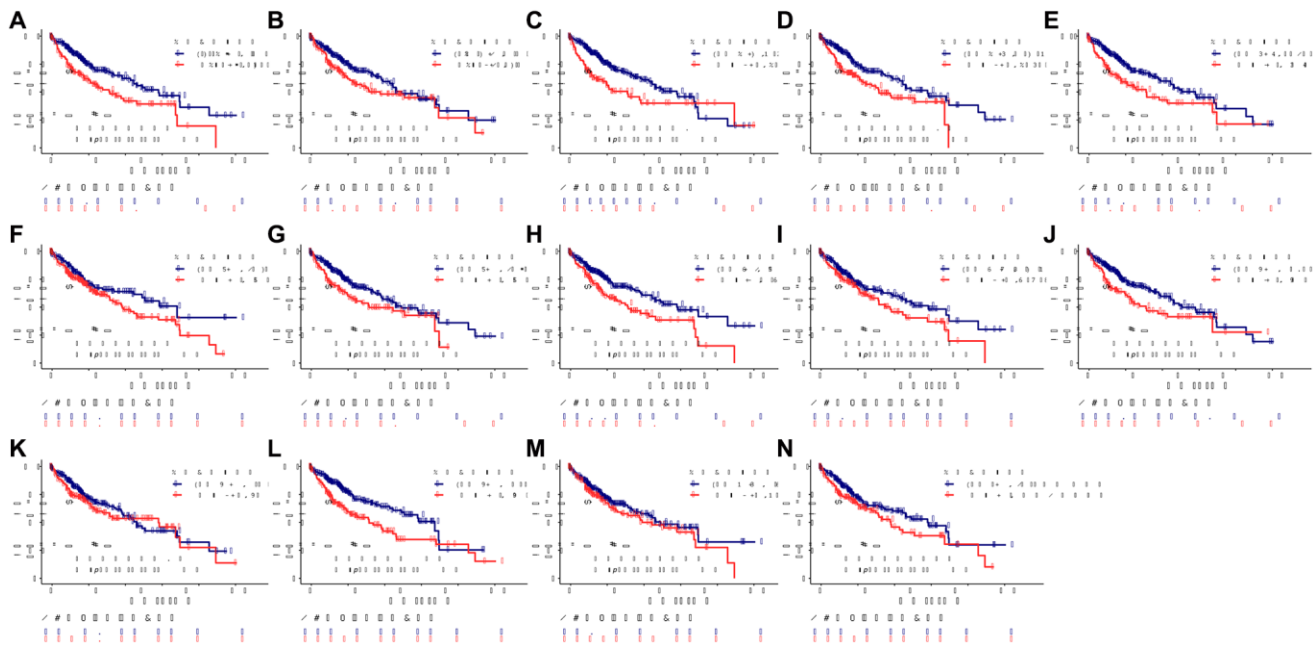

**Supplementary Figure 2.** Survival analyses of 14DRGs in HCC, including ACTB (A), ACTN4 (B), CAPZB (C), CD2AP (D), DSTN (E), FLNA (F), FLNB (G), INF2 (H), IQGAP1 (I), MYH9 (J), MYH10 (K), MYL6 (L), PDLIM1 (M), TLN1 (N).

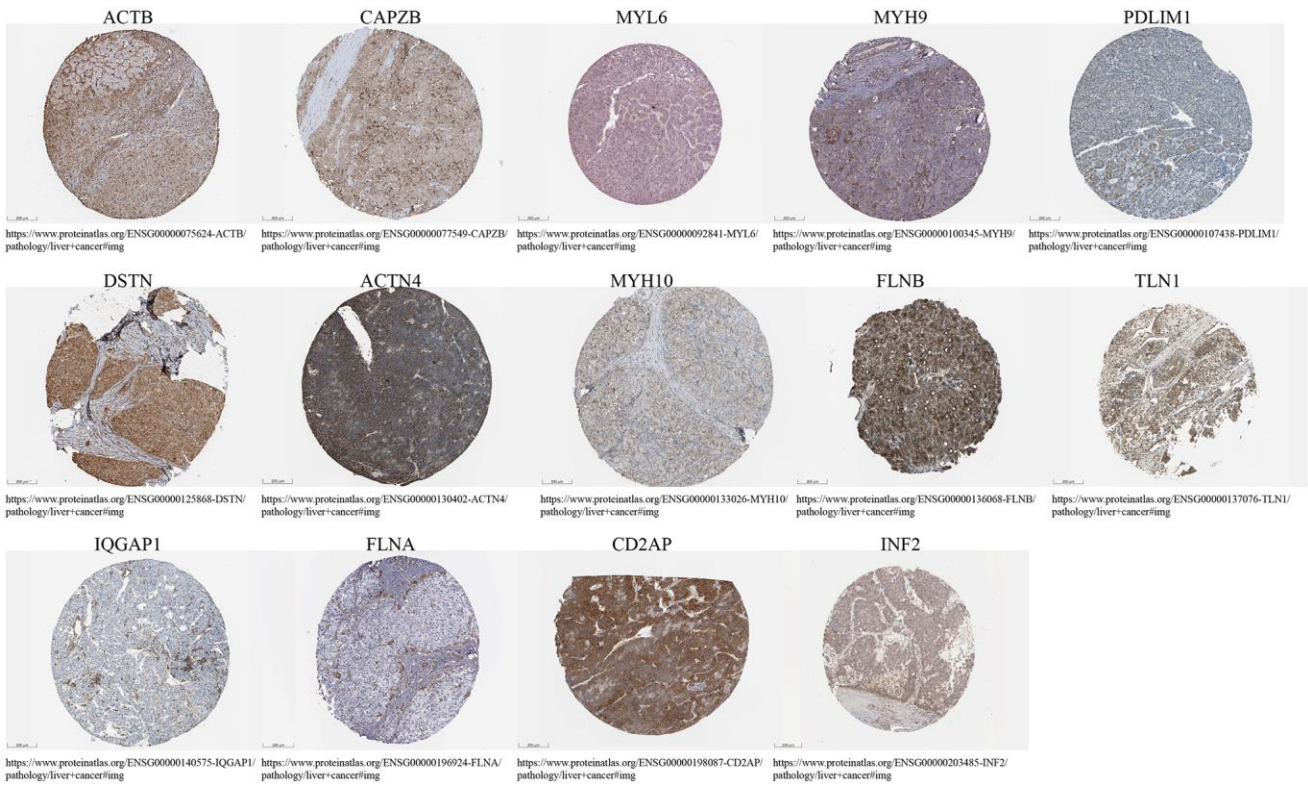

**Supplementary Figure 3. The immunohistochemistry pictures of 14 DRGs in HCC from the Human Protein Atlas (HPA) database.**
