# Supplementary material for: A novel disulfidptosis-related lncRNAs signature for predicting survival and immune response in hepatocellular carcinoma
Source: Aging (Albany NY). 2024 Jan 4;16(1):267–84. doi: 10.18632/aging.205367 (PMC10817373; doi:10.18632/aging.205367)
Supplement: Supplementary Table 1 [file aging-16-205367-s002.xlsx]

## Sheet: Sheet1
Supplementary Table 1. Differential analysis of 738 disulfidptosis-related lncRNAs.
Symbol	logFC	logCPM	F	PValue	FDR
CAPN10-DT	2.32851	0.139111	163.195	8.04206e-32	1.69128e-29
MIR4435-2HG	1.83065	2.89936	153.957	2.35716e-30	4.11583e-28
HCG25	1.84093	-1.10446	150.728	7.78037e-30	1.24437e-27
ZKSCAN2-DT	1.94158	0.0389642	149.813	1.0923e-29	1.69017e-27
DDX11-AS1	2.8885	-1.23613	146.429	3.85394e-29	5.51504e-27
AC005332.5	1.6945	1.23209	133.639	4.85031e-27	5.05828e-25
SNHG1	1.61589	4.13912	125.832	9.82223e-26	8.67478e-24
LENG8-AS1	1.58488	0.0694117	119.024	1.40366e-24	1.04971e-22
AL606489.1	3.08661	-1.47561	116.532	3.74709e-24	2.67103e-22
AL355488.1	1.91714	1.20238	116.244	4.19948e-24	2.96024e-22
ASB16-AS1	1.12398	2.30335	114.321	8.99334e-24	6.0697e-22
AC102953.2	2.06787	0.425411	113.206	1.4006e-23	9.14474e-22
BACE1-AS	1.23286	0.858786	110.909	3.49738e-23	2.16821e-21
AC026369.3	-2.5851	-2.73921	107.286	1.49467e-22	8.68621e-21
AC092910.3	1.50364	-0.250822	105.227	3.42718e-22	1.88248e-20
AL133367.1	2.13375	-0.422953	105.073	3.64714e-22	1.99753e-20
AC022007.1	1.67641	0.59006	101.046	1.86842e-21	9.24856e-20
THUMPD3-AS1	1.08501	3.01618	100.153	2.68822e-21	1.29692e-19
AC011921.1	2.41589	-2.39041	99.4557	3.574e-21	1.6879e-19
GARS1-DT	1.08669	3.37873	97.7756	7.10849e-21	3.1984e-19
AC091057.1	2.28728	0.202414	95.1692	2.07528e-20	8.85599e-19
TMCO1-AS1	1.9438	-1.66789	91.694	8.73646e-20	3.38994e-18
AC004816.1	2.02344	-0.363133	91.5563	9.25066e-20	3.57489e-18
GIHCG	1.65127	1.18489	89.3491	2.31787e-19	8.51638e-18
CCDC18-AS1	1.36515	2.0673	88.616	3.14779e-19	1.14071e-17
RNF139-AS1	1.4516	0.00701543	88.6146	3.14958e-19	1.14071e-17
CDKN2A-DT	4.14853	-3.4008	88.0697	3.95517e-19	1.40995e-17
AC129507.1	-1.76424	-1.70543	84.6537	1.65901e-18	5.4534e-17
LINC00205	1.46417	2.10198	84.5723	1.71685e-18	5.62892e-17
AC024560.4	2.37042	-2.21369	82.6857	3.8073e-18	1.19378e-16
AL158212.3	1.53061	0.444082	81.6776	5.83436e-18	1.7696e-16
AC110995.1	-1.53399	-0.5617	79.8833	1.25014e-17	3.63533e-16
AC232271.1	1.36249	-0.302417	78.0457	2.7365e-17	7.58667e-16
MAPKAPK5-AS1	0.916934	3.07768	77.809	3.02778e-17	8.31547e-16
AC022210.1	1.63562	-1.31372	76.56	5.16766e-17	1.36792e-15
AC083855.2	2.20018	-0.577621	76.4562	5.40275e-17	1.42717e-15
ZNF337-AS1	1.08162	0.76953	75.5521	7.96326e-17	2.04673e-15
AC048341.2	1.63334	-1.05447	75.3907	8.53505e-17	2.18191e-15
SNHG12	1.3273	2.17256	74.8408	1.0811e-16	2.72892e-15
CYTOR	1.98476	2.92059	73.4406	1.97634e-16	4.84725e-15
RAD51-AS1	1.10358	1.42458	72.3937	3.10643e-16	7.44154e-15
AL021707.2	1.64589	-0.954164	72.2445	3.31364e-16	7.87352e-15
LINC01537	-1.49115	-1.61924	71.8596	3.91431e-16	9.20309e-15
AC011462.4	1.94289	-2.10582	70.7046	6.45843e-16	1.47033e-14
AC004812.2	1.07641	-0.240721	69.8296	9.44591e-16	2.10022e-14
AL133410.1	1.81368	-1.27287	69.7162	9.92331e-16	2.19867e-14
AC025171.2	1.45755	0.529106	68.996	1.35786e-15	2.9485e-14
AL024498.1	1.96308	-2.70565	66.6864	3.72448e-15	7.58546e-14
SNHG32	1.38075	3.04349	66.5688	3.92142e-15	7.94829e-14
SNHG3	1.68817	3.25367	66.5277	3.9926e-15	8.07965e-14
LINC02245	1.31465	0.973224	65.6212	5.94208e-15	1.17682e-13
Z97832.2	1.64341	-1.49271	65.2768	6.91273e-15	1.35566e-13
AC006252.1	1.91559	-2.44738	63.153	1.76164e-14	3.22855e-13
AC145285.6	1.27561	-1.71905	61.623	3.46607e-14	6.06881e-13
LINC01011	1.13752	-0.208631	61.2998	4.00004e-14	6.96212e-13
C2CD4D-AS1	1.54996	1.05018	60.7402	5.12736e-14	8.76788e-13
AL136419.3	1.93263	-2.01106	60.5794	5.50709e-14	9.3919e-13
CTC-338M12.4	1.27155	-0.767386	60.5313	5.626e-14	9.5861e-13
AL139287.1	0.948205	-0.130064	60.4337	5.87526e-14	9.97956e-13
AC020915.2	1.04825	0.88445	60.2607	6.34488e-14	1.07056e-12
AP002954.1	-1.74595	-2.38872	60.2124	6.48251e-14	1.09136e-12
LINC01679	-1.34342	-0.913195	59.9099	7.41579e-14	1.23267e-12
AL109615.4	1.44491	0.0412661	59.8403	7.64902e-14	1.26536e-12
AC016747.1	0.714717	3.0065	59.8359	7.66404e-14	1.26675e-12
LINC00221	7.19287	1.05806	59.821	7.71517e-14	1.27409e-12
AC008875.1	2.40709	-3.013	59.584	8.57352e-14	1.40366e-12
MCM3AP-AS1	1.28238	0.0931256	59.2271	1.00507e-13	1.62524e-12
AL357079.1	1.52991	-1.38307	59.183	1.02499e-13	1.65113e-12
LINC01116	3.2906	-0.429943	58.9052	1.16013e-13	1.85237e-12
AC073842.2	2.18181	-2.54399	58.7501	1.24325e-13	1.97267e-12
AC009133.1	1.51143	-0.921308	58.6441	1.30346e-13	2.05962e-12
ZNF775-AS1	2.43203	-3.51132	58.4986	1.39088e-13	2.18689e-12
AC008764.8	1.20186	-1.46509	58.4925	1.39465e-13	2.19189e-12
AL035461.2	1.86514	-1.14064	58.4105	1.44671e-13	2.26063e-12
AC007066.2	1.06694	-0.49675	58.3531	1.48425e-13	2.3136e-12
FBXL19-AS1	1.5354	0.105247	58.214	1.57938e-13	2.44985e-12
GUSBP11	1.553	0.353112	57.8549	1.8542e-13	2.83682e-12
AL031985.3	1.04569	0.65277	57.7989	1.90122e-13	2.90408e-12
AL355388.1	2.51127	-2.06969	57.567	2.10903e-13	3.19944e-12
AC124016.1	1.44379	-2.09989	56.7183	3.08408e-13	4.53089e-12
AL162458.1	1.22149	0.698069	56.6996	3.10997e-13	4.56541e-12
SBF2-AS1	0.953221	0.986838	56.015	4.22809e-13	6.05274e-12
AC004540.2	-2.07703	-0.707719	55.9264	4.39977e-13	6.27961e-12
STARD7-AS1	0.567761	1.18549	54.7128	7.59385e-13	1.04542e-11
LINC00653	1.42875	-1.47191	54.4836	8.41972e-13	1.14668e-11
ZEB1-AS1	0.843698	1.28005	54.3713	8.85684e-13	1.19807e-11
ZNF529-AS1	0.971826	0.709235	54.0491	1.02418e-12	1.37177e-11
AC022211.2	1.44063	-0.834805	53.7794	1.15673e-12	1.52885e-11
AL590652.1	2.34698	-1.25539	53.5767	1.26759e-12	1.66268e-11
AC008870.2	1.21714	-1.69282	52.4939	2.06844e-12	2.60281e-11
AC245060.6	1.66116	-0.785751	52.4204	2.13847e-12	2.68119e-11
AC009065.4	1.31453	-1.04393	52.2231	2.33836e-12	2.90976e-11
AC008610.1	1.70988	-1.35096	51.9838	2.60629e-12	3.21471e-11
AL355574.1	1.17522	-1.34755	51.7782	2.86093e-12	3.50416e-11
AP003419.3	2.07129	-2.16677	51.0161	4.04367e-12	4.81458e-11
LINC02878	1.39056	-1.81101	50.9803	4.11012e-12	4.88301e-11
AC127024.5	1.67938	-2.69929	50.731	4.60331e-12	5.41654e-11
PTOV1-AS2	1.17674	-0.609182	50.4034	5.34319e-12	6.20844e-11
AC026401.3	1.15558	1.33135	49.9941	6.43792e-12	7.35251e-11
LINC01943	1.85338	-1.09132	49.9215	6.65457e-12	7.57042e-11
AC090559.1	-1.05142	0.673923	49.4374	8.29797e-12	9.29553e-11
AC007773.1	1.72811	-0.664185	49.2586	9.0033e-12	1.00296e-10
SCAMP1-AS1	0.66747	2.14472	48.9221	1.04988e-11	1.15435e-10
SNHG21	1.30844	-1.97812	48.7554	1.13298e-11	1.23857e-10
AC074117.1	0.782134	1.92707	48.2954	1.3982e-11	1.4967e-10
CTBP1-DT	0.614035	3.60836	48.132	1.50677e-11	1.60479e-10
AC106820.5	2.19609	-2.9947	47.76	1.78665e-11	1.88181e-10
LINC01775	2.49444	-3.80822	46.9796	2.55543e-11	2.62828e-10
HEIH	0.940216	2.38909	46.8258	2.74246e-11	2.80472e-10
AC021321.1	1.83119	-2.72201	46.7814	2.79899e-11	2.85777e-10
HCG18	0.747192	3.43588	46.6971	2.90943e-11	2.95878e-10
AC016394.2	1.17224	-1.09363	46.1575	3.72864e-11	3.72619e-10
AC023302.1	2.52235	-3.6877	46.1156	3.80118e-11	3.79371e-10
AC048341.1	1.06988	0.259587	45.9172	4.16445e-11	4.13027e-10
LINC01615	3.06629	-2.25141	45.7215	4.55723e-11	4.48593e-10
MKLN1-AS	0.985938	1.43071	45.5347	4.96683e-11	4.84279e-10
AC023503.1	4.90872	-2.77008	45.4806	5.09203e-11	4.95091e-10
MIR600HG	1.37948	0.853942	45.4591	5.14277e-11	4.99641e-10
AC087294.1	1.08965	-2.25762	45.1493	5.9325e-11	5.69679e-10
AC108752.1	5.93678	-2.10996	45.1441	5.94677e-11	5.70761e-10
AC026748.7	0.951531	2.14341	45.1026	6.06163e-11	5.8076e-10
AC073349.4	1.95076	-3.49747	45.0296	6.26907e-11	5.99127e-10
LINC01956	4.90345	-1.7605	44.8989	6.65901e-11	6.3353e-10
AL928654.1	1.1325	0.0467205	44.6161	7.58759e-11	7.14585e-10
AC005261.1	0.610458	3.9353	44.524	7.9173e-11	7.42844e-10
LINC00862	1.53097	-0.366489	44.4839	8.06544e-11	7.54512e-10
AC092171.5	1.3047	0.174616	44.4486	8.198e-11	7.65784e-10
AL831711.1	1.61461	-2.31501	44.3679	8.50966e-11	7.91593e-10
AC004076.2	1.37732	-1.54622	44.2383	9.035e-11	8.36986e-10
AL121772.3	1.59484	-2.5497	44.1974	9.20726e-11	8.51286e-10
AC009509.4	-1.16603	-2.29341	44.1211	9.53833e-11	8.79483e-10
AC092171.3	1.22956	0.769776	44.0933	9.66146e-11	8.88961e-10
THBS3-AS1	1.49301	-2.10139	43.949	1.03284e-10	9.45759e-10
AL031778.1	1.68389	-1.52038	43.8889	1.06197e-10	9.70098e-10
AL512770.1	1.23149	-1.49459	43.8576	1.07748e-10	9.83084e-10
AC074138.1	1.88488	-3.07974	43.7936	1.10985e-10	1.00972e-09
AC098484.4	1.25234	-1.10096	43.4031	1.32985e-10	1.19643e-09
AC012360.3	0.771928	-0.157207	42.8681	1.70421e-10	1.50408e-09
AC090114.2	0.738634	1.82916	42.5772	1.9506e-10	1.71114e-09
AC092757.3	2.08236	-3.00147	42.0394	2.50438e-10	2.14464e-09
LINC00519	3.19184	-3.18149	41.2504	3.61575e-10	3.02266e-09
AC244033.2	0.993223	0.729987	40.9222	4.21365e-10	3.47396e-09
POLH-AS1	1.04138	-1.61802	40.153	6.0342e-10	4.84275e-09
NDUFB2-AS1	0.958961	-2.10729	40.0514	6.32773e-10	5.06232e-09
LINC00622	1.52852	-1.42463	39.7555	7.2667e-10	5.74112e-09
AC009061.2	0.719768	-0.163462	39.5772	7.8993e-10	6.19845e-09
AC010168.2	1.1094	-0.140784	39.4589	8.34914e-10	6.52855e-09
AP001062.1	1.07477	-0.553053	39.1687	9.56474e-10	7.38803e-09
RNF157-AS1	2.59527	-0.595897	39.1459	9.66742e-10	7.45826e-09
LINC02709	1.4567	-1.34835	38.9724	1.04867e-09	8.03977e-09
AC107959.3	2.13721	-1.378	38.9251	1.0722e-09	8.2026e-09
AL021392.1	2.00793	-1.86541	38.9233	1.07309e-09	8.2072e-09
AC104532.2	1.0543	-1.22522	38.9208	1.07436e-09	8.21198e-09
AC005253.1	1.22127	-2.05734	38.7917	1.1414e-09	8.68255e-09
AC245060.5	1.20113	-0.673749	38.4063	1.36772e-09	1.02316e-08
DNM3OS	-1.30879	-0.419354	38.257	1.46712e-09	1.09116e-08
AL049840.5	0.7827	2.02718	37.7422	1.86884e-09	1.36383e-08
AC004918.3	0.898508	0.0164955	37.7381	1.87245e-09	1.36568e-08
KTN1-AS1	0.778115	0.407258	37.4748	2.11946e-09	1.52885e-08
AL121933.2	-1.17426	-1.53788	37.4045	2.19079e-09	1.57463e-08
NCK1-DT	0.509224	0.340334	37.191	2.42257e-09	1.72688e-08
ZFAS1	1.21742	3.43423	37.1148	2.51118e-09	1.78502e-08
AC004492.1	1.06686	-2.04803	36.7036	3.04852e-09	2.12921e-08
MUC20-OT1	0.752936	3.38004	36.5665	3.25237e-09	2.26163e-08
AC004923.4	1.42107	-2.56292	36.3688	3.57066e-09	2.46718e-08
AC015922.3	-1.01378	-0.787187	36.1952	3.87569e-09	2.65864e-08
AL031600.1	1.63676	-2.26045	35.8667	4.52686e-09	3.0672e-08
AC040977.1	0.92026	0.00971022	35.8267	4.61339e-09	3.12027e-08
AC093702.1	3.433	-3.8923	35.6145	5.1006e-09	3.41942e-08
BAIAP2-DT	0.799176	4.34839	35.2321	6.11327e-09	4.03926e-08
LINC01772	0.837521	-1.63071	35.177	6.27497e-09	4.12819e-08
ZBTB11-AS1	0.63288	0.946057	35.1723	6.289e-09	4.13598e-08
SCTR-AS1	2.49471	0.758086	35.1598	6.32632e-09	4.15694e-08
AC109460.1	1.30272	-2.722	34.8966	7.16718e-09	4.64688e-08
AC015813.1	1.16543	1.50734	34.6668	7.99305e-09	5.12992e-08
DLGAP1-AS2	1.11659	0.219448	34.622	8.16496e-09	5.23231e-08
FAM111A-DT	0.679876	0.737187	34.5852	8.30852e-09	5.30911e-08
AL033384.2	2.20857	-3.60942	34.5782	8.33643e-09	5.32426e-08
ASH1L-AS1	0.719757	-0.439003	34.5615	8.4026e-09	5.36293e-08
AC020915.1	1.44645	-2.6131	34.5258	8.5463e-09	5.44369e-08
AC007996.1	0.963757	0.839467	34.4781	8.74217e-09	5.56194e-08
AC051635.1	4.28472	-3.32276	34.4208	8.98336e-09	5.69729e-08
NRAV	0.616924	2.21993	34.3902	9.11497e-09	5.77403e-08
AL358472.4	0.820422	-1.57062	34.2832	9.59001e-09	6.04978e-08
AC011815.1	1.20131	-0.822462	34.1966	9.99304e-09	6.28216e-08
AC010618.3	0.853562	-0.682702	34.1013	1.04564e-08	6.54105e-08
LINC01605	3.25324	-2.75801	33.7962	1.2089e-08	7.47508e-08
AC006504.5	0.695171	0.665097	33.7738	1.22186e-08	7.55158e-08
AC007038.1	0.915636	-1.87117	33.6604	1.28962e-08	7.94072e-08
AL592148.3	0.794883	-0.658929	33.3326	1.50752e-08	9.14629e-08
AP001453.2	1.32929	-2.97093	33.2784	1.54699e-08	9.3693e-08
COLCA1	1.87457	1.01191	32.7824	1.95988e-08	1.16095e-07
AC090409.1	1.47854	-2.54198	32.4133	2.3376e-08	1.36515e-07
LINC01948	1.71605	0.349386	32.1895	2.60153e-08	1.50589e-07
AP000866.2	1.12473	-1.88688	31.8331	3.08517e-08	1.75909e-07
CTB-178M22.2	1.83566	-2.71947	31.7558	3.20143e-08	1.81884e-07
AC005519.1	1.33044	-2.20334	31.7357	3.23242e-08	1.8348e-07
AC145423.1	1.64046	-2.83765	31.723	3.25221e-08	1.84494e-07
AC124067.2	2.10891	-2.73361	31.5683	3.50222e-08	1.97441e-07
PELATON	-1.17418	0.844002	31.5636	3.51015e-08	1.97823e-07
MCCC1-AS1	1.38234	-2.53328	31.3651	3.8605e-08	2.16135e-07
AL008721.2	1.22188	-1.09069	31.289	4.00398e-08	2.23349e-07
AC026801.2	0.872335	-0.598219	31.2192	4.14013e-08	2.30131e-07
AC107068.1	0.742013	0.68174	31.0433	4.50472e-08	2.48727e-07
AC011352.3	2.57316	-3.71245	30.7334	5.22742e-08	2.85196e-07
AC012640.1	2.31255	-3.40461	30.6973	5.31882e-08	2.89685e-07
AC009120.2	0.938879	0.306033	30.6239	5.50968e-08	2.99523e-07
U52111.1	1.59858	-2.97957	30.5057	5.83155e-08	3.15265e-07
PRR34-AS1	1.35254	0.464347	30.4844	5.89152e-08	3.18096e-07
LINC02041	2.85032	-2.05827	30.1976	6.76286e-08	3.61151e-07
WDFY3-AS2	-0.927944	-0.0268597	30.1706	6.85119e-08	3.65253e-07
UCKL1-AS1	1.28338	-1.80719	30.1448	6.9368e-08	3.69172e-07
AL354836.1	0.96433	-0.558666	30.0191	7.36952e-08	3.90031e-07
LINC01876	1.88334	-1.27958	29.8042	8.1732e-08	4.27999e-07
AC010327.6	0.898711	-0.174591	29.7315	8.46449e-08	4.41734e-07
AC026356.2	1.37141	-2.65716	29.7022	8.58465e-08	4.47269e-07
AC099791.2	2.03612	-3.61895	29.5556	9.21337e-08	4.76763e-07
AC113346.1	2.9415	-4.10252	29.544	9.26489e-08	4.78778e-07
PICSAR	3.8786	-2.84663	29.5268	9.34207e-08	4.82504e-07
LINC02154	3.24737	-3.02338	29.3486	1.01803e-07	5.22043e-07
AP001107.4	1.50923	-3.13856	29.3047	1.03984e-07	5.32296e-07
LINC02593	-1.60741	-0.469085	29.1424	1.12453e-07	5.72263e-07
AC127024.4	1.23744	-3.07731	29.0115	1.1979e-07	6.06194e-07
AC020661.1	1.21477	-2.25385	28.7929	1.33134e-07	6.66633e-07
LINC00339	1.11959	-1.21246	28.1516	1.81566e-07	8.84137e-07
MIR4453HG	0.635787	0.398774	28.1433	1.82296e-07	8.87464e-07
AC010326.3	0.59908	0.651446	28.0852	1.87501e-07	9.10942e-07
AP001432.1	1.47589	-3.29173	27.8445	2.10694e-07	1.01327e-06
KANSL1L-AS1	0.934409	-1.81759	27.7839	2.16984e-07	1.03971e-06
AC026368.1	1.97103	-2.71741	27.751	2.2047e-07	1.05496e-06
AL358472.3	0.844648	-1.92582	27.7275	2.22995e-07	1.06597e-06
AC023043.4	1.11351	-1.37742	27.6754	2.28703e-07	1.09093e-06
AC040970.1	1.76159	0.0330624	27.6737	2.28894e-07	1.0917e-06
AL592295.4	0.933515	-1.11059	27.2651	2.79105e-07	1.30952e-06
AL683813.1	0.761969	-0.78857	27.2584	2.80007e-07	1.31294e-06
AL117335.1	1.51089	-1.52511	27.2302	2.83874e-07	1.33025e-06
UBR5-AS1	0.869367	-0.803027	27.2154	2.85916e-07	1.3395e-06
AC091588.3	-1.29588	-3.42371	27.1158	3.00095e-07	1.40144e-06
AP000487.1	0.822667	-1.88857	27.0967	3.02904e-07	1.41334e-06
AC016866.1	2.51043	-3.61643	26.9659	3.22784e-07	1.49601e-06
AC087477.2	-0.902624	-0.553212	26.9523	3.24922e-07	1.50517e-06
AL021368.2	0.758856	-0.753449	26.4749	4.09908e-07	1.85752e-06
AP003065.1	1.09701	-1.32002	26.3955	4.26059e-07	1.92224e-06
DGUOK-AS1	0.890384	-1.90573	26.2893	4.48702e-07	2.01461e-06
AC092757.2	1.56575	-3.02135	25.9808	5.21524e-07	2.31265e-06
AC006547.1	0.723178	-1.1992	25.8421	5.58049e-07	2.46057e-06
AL157392.3	0.665933	1.42906	25.7389	5.86877e-07	2.57545e-06
SNHG17	0.709301	3.88783	25.6481	6.13496e-07	2.68052e-06
WARS2-AS1	0.702819	1.31057	25.6297	6.19038e-07	2.70288e-06
CH17-340M24.3	0.824656	2.39963	25.5643	6.39138e-07	2.78234e-06
AL139349.1	1.211	-2.07867	25.5159	6.54417e-07	2.84332e-06
AC012467.2	0.452187	1.47457	25.4365	6.80335e-07	2.94451e-06
RASAL2-AS1	0.754406	-0.845541	25.3394	7.13394e-07	3.07431e-06
ERICD	0.90935	-0.674965	25.1982	7.64422e-07	3.27899e-06
LINC00294	0.453069	2.3348	25.1889	7.67906e-07	3.29245e-06
LINC00839	1.72225	-0.422461	25.0989	8.02449e-07	3.42512e-06
AC109460.2	1.00595	-0.585315	25.0317	8.29312e-07	3.52982e-06
AC092143.3	1.58582	-3.22647	24.9963	8.43781e-07	3.58586e-06
NOP14-AS1	0.468342	2.71737	24.9729	8.53532e-07	3.62428e-06
AP000759.1	0.716745	-0.761712	24.8305	9.15172e-07	3.86166e-06
AC138150.2	1.23125	-1.99106	24.8236	9.18255e-07	3.87381e-06
AC016065.1	0.571678	0.366056	24.702	9.74638e-07	4.09217e-06
UBE2Q1-AS1	1.39335	-3.27137	24.6029	1.02316e-06	4.28125e-06
LINC00847	0.50968	1.10205	24.5668	1.04143e-06	4.34814e-06
NFYC-AS1	0.950225	-1.2643	24.5551	1.0474e-06	4.37025e-06
AC114763.1	0.775405	-1.67304	24.5009	1.07564e-06	4.48115e-06
AC007998.3	1.28076	-2.74551	24.3772	1.14293e-06	4.73197e-06
U91328.1	0.721199	2.06323	24.3368	1.1658e-06	4.81982e-06
KRTAP5-AS1	1.89201	-1.86641	24.3049	1.18418e-06	4.88787e-06
AC015922.2	-1.13293	-2.08117	24.2077	1.24206e-06	5.10295e-06
AC006435.2	1.11088	-1.75421	24.1981	1.24792e-06	5.12482e-06
AC002091.1	-1.08841	-3.04887	24.1568	1.27353e-06	5.22041e-06
AC018904.1	0.644678	0.27006	23.7959	1.52064e-06	6.13185e-06
AC010547.2	-1.9991	-0.941716	23.7317	1.56942e-06	6.313e-06
RBM38-AS1	0.823438	-2.09613	23.5809	1.69025e-06	6.76472e-06
AC090517.5	0.532894	0.610185	23.5223	1.73971e-06	6.9488e-06
DGCR11	0.725212	0.558901	23.3662	1.87868e-06	7.4616e-06
AL138756.1	0.78614	1.45074	23.3568	1.88743e-06	7.49559e-06
AP000757.2	2.73919	-3.25671	23.1767	2.06251e-06	8.13567e-06
AC092338.3	0.876225	-1.79182	23.1504	2.08946e-06	8.22919e-06
AP001505.1	0.903751	0.656986	23.1251	2.11566e-06	8.32208e-06
NRSN2-AS1	0.699116	0.486248	23.1123	2.12912e-06	8.36464e-06
GPRC5D-AS1	0.582907	1.10204	22.989	2.26257e-06	8.84873e-06
AC010173.1	0.934213	-2.41076	22.9213	2.33932e-06	9.13106e-06
SOS1-IT1	0.592751	-0.492867	22.8957	2.36908e-06	9.23682e-06
AC003086.1	1.57301	-2.75891	22.5539	2.80455e-06	1.07986e-05
MRPS30-DT	0.978322	-0.693984	22.5532	2.80558e-06	1.08005e-05
AC022400.4	0.685944	-2.01423	22.5293	2.83885e-06	1.09185e-05
PRKCZ-AS1	0.808325	-0.779251	22.5161	2.85751e-06	1.0987e-05
AC100861.1	0.802087	-0.12752	22.2449	3.26747e-06	1.24314e-05
ZNF32-AS1	1.11708	-3.05462	22.1321	3.45493e-06	1.30936e-05
AC055855.1	1.05177	-2.91747	22.0907	3.52653e-06	1.3353e-05
AL021707.4	1.39753	-3.62636	21.9201	3.83739e-06	1.44139e-05
AC008969.1	0.820921	0.4825	21.8615	3.95043e-06	1.48107e-05
AC026356.1	1.06008	-1.67375	21.8543	3.96454e-06	1.48534e-05
AL162253.2	0.759322	-0.469252	21.8376	3.99732e-06	1.49718e-05
AL356019.2	1.10586	-1.87368	21.8349	4.00274e-06	1.49891e-05
GMDS-DT	0.403878	2.30466	21.7273	4.2219e-06	1.57359e-05
NIFK-AS1	0.448372	1.40611	21.5488	4.61278e-06	1.70621e-05
AC010834.3	0.830036	-1.6247	21.3197	5.16799e-06	1.89664e-05
PAXBP1-AS1	0.548323	-0.0224727	21.2664	5.30666e-06	1.94378e-05
AC024075.3	0.821595	-2.0185	21.2539	5.33958e-06	1.95452e-05
AC004801.6	0.762275	-1.99779	20.9792	6.12055e-06	2.21631e-05
AC005670.3	0.423989	2.12133	20.7572	6.83509e-06	2.45265e-05
AC010969.2	0.542383	1.86439	20.742	6.88708e-06	2.46945e-05
AC108463.2	1.54863	-3.78295	20.6693	7.14079e-06	2.5544e-05
AL442125.1	1.07176	-2.01577	20.497	7.78057e-06	2.76637e-05
AP000766.1	-0.45925	0.134598	20.4778	7.85549e-06	2.79066e-05
GHRLOS	0.798402	-1.75669	20.2546	8.77969e-06	3.09271e-05
AC069234.5	1.22033	-3.12852	19.997	9.98408e-06	3.47801e-05
ZNF32-AS2	1.0312	-2.42104	19.7788	1.11335e-05	3.84711e-05
AC006449.2	1.09986	-3.12421	19.6256	1.20195e-05	4.12741e-05
LINC00342	0.768851	1.9513	19.5754	1.23253e-05	4.22251e-05
UNC5B-AS1	1.72394	-3.49054	19.4407	1.31841e-05	4.49086e-05
DLEU1	0.686199	1.03128	19.4398	1.319e-05	4.49246e-05
REPIN1-AS1	0.856843	-1.08302	19.38	1.35908e-05	4.617e-05
AL445309.1	1.0414	-2.38939	19.2515	1.44942e-05	4.89913e-05
AC008735.4	0.926808	-2.4497	19.219	1.47319e-05	4.97269e-05
HLA-F-AS1	0.820577	-0.382192	19.2066	1.48238e-05	5.00106e-05
AC004596.1	1.22884	-3.47074	19.1833	1.49981e-05	5.05582e-05
AC025287.3	1.04401	-3.179	19.0298	1.61968e-05	5.42388e-05
AC022150.4	1.55635	-1.30533	19.015	1.6318e-05	5.46206e-05
AL034548.2	0.878532	-1.32585	18.9882	1.65381e-05	5.52748e-05
AL138966.2	1.26	-3.3816	18.93	1.7028e-05	5.67726e-05
AC004943.2	0.717064	0.449966	18.8628	1.76121e-05	5.85916e-05
AP001372.2	0.446835	1.38036	18.8016	1.81613e-05	6.02817e-05
CTBP1-AS	0.857648	-0.69197	18.7783	1.83754e-05	6.09287e-05
CERNA2	2.85932	-2.73039	18.706	1.90543e-05	6.29801e-05
SNHG9	0.945952	2.35054	18.513	2.09938e-05	6.88548e-05
KCCAT198	1.95231	-3.89818	18.4733	2.14169e-05	7.00916e-05
RNF213-AS1	0.648716	-1.10378	18.3736	2.25176e-05	7.34349e-05
AL592071.1	1.63902	-3.63661	18.2592	2.38512e-05	7.73729e-05
LYRM4-AS1	0.605325	0.789418	18.1762	2.48688e-05	8.04275e-05
AC078883.1	0.695689	-1.66789	18.1704	2.49415e-05	8.06214e-05
LINC01978	1.44344	-2.20382	17.9933	2.72679e-05	8.75098e-05
RNF216P1	0.420439	2.71071	17.8601	2.9161e-05	9.3083e-05
TRAF3IP2-AS1	0.41515	-0.13972	17.7807	3.03513e-05	9.65747e-05
LINC01914	1.69616	-2.26237	17.7723	3.04811e-05	9.69147e-05
AC002091.2	-1.03613	-3.65469	17.5904	3.34102e-05	0.000105453
AC137561.1	0.985941	-2.63561	17.5168	3.46743e-05	0.000109054
LINC02298	1.4648	-1.43721	17.4918	3.51153e-05	0.000110313
Z98884.2	0.748812	-2.31679	17.4828	3.52749e-05	0.000110769
C2orf27A	1.04046	-0.627502	17.4191	3.6429e-05	0.000114041
AL078644.1	0.883041	-2.61468	17.2198	4.02891e-05	0.000125039
AC015849.3	0.872059	-1.87182	17.193	4.08379e-05	0.000126546
AL021978.1	1.81303	-2.22652	17.1696	4.13252e-05	0.000127931
AC027097.1	0.477763	-0.15609	17.0943	4.29292e-05	0.000132455
AL157893.2	0.697168	-1.98907	17.0126	4.47401e-05	0.000137552
ZNF528-AS1	0.924854	0.556842	16.9503	4.6175e-05	0.000141586
AL590705.3	0.807728	-2.12104	16.741	5.13393e-05	0.000155964
HCP5	0.757834	4.69507	16.6867	5.27724e-05	0.000159871
AC012313.1	0.43118	2.05288	16.6345	5.41883e-05	0.000163848
ITGA6-AS1	-0.873776	-2.99918	16.6192	5.46102e-05	0.000165045
AC007877.1	-0.817997	-2.43556	16.5421	5.67881e-05	0.000171192
AC024075.1	0.937779	-1.74762	16.4707	5.88837e-05	0.000177018
EIF3J-DT	0.418157	1.59411	16.4537	5.93933e-05	0.000178375
TRIM52-AS1	0.569595	2.833	16.3594	6.23075e-05	0.000186413
MIATNB	0.500158	0.394356	16.308	6.39526e-05	0.00019093
AP001527.2	0.955982	-2.82072	16.2278	6.66126e-05	0.00019794
Z98200.1	1.0872	-3.40307	16.1544	6.91474e-05	0.000204753
AC002398.1	0.859925	-2.84528	16.0818	7.17465e-05	0.000211971
AC026369.2	0.827129	-1.58804	16.078	7.18857e-05	0.000212333
AC008915.2	0.642551	-0.139921	15.9368	7.72398e-05	0.0002266
AC048344.4	1.37379	-3.63887	15.9187	7.79556e-05	0.000228506
Z83843.1	0.607129	0.357583	15.8968	7.88288e-05	0.000230834
LINC01836	1.21935	0.166836	15.7709	8.40494e-05	0.000244897
AC093673.1	0.610183	2.16801	15.7092	8.67317e-05	0.000252076
AC009237.15	0.708225	-1.5726	15.6863	8.77502e-05	0.000254803
AP001469.2	1.16918	-3.53206	15.4885	9.70644e-05	0.000279271
AC093484.4	1.01178	-2.61304	15.4881	9.70815e-05	0.000279299
AC139795.2	0.586254	0.356829	15.4602	9.84764e-05	0.000282927
N4BP2L2-IT2	0.579955	-0.214778	15.4348	9.97606e-05	0.000286393
AC092301.1	0.996938	-3.23256	15.3449	0.000104443	0.000298626
AL356481.1	0.408463	-1.36792	15.2992	0.00010691	0.000304924
AC004263.2	0.736625	-0.93928	15.2722	0.000108394	0.000308718
AC018529.2	0.766495	-1.99336	15.2305	0.000110728	0.000314894
AC010186.3	0.712703	-0.447541	15.1748	0.000113928	0.000323054
AC009088.1	1.00128	-3.37398	15.1645	0.000114529	0.000324635
AC009549.1	1.08232	-1.00117	15.1487	0.000115453	0.000327086
HMGN3-AS1	0.570651	-0.298879	15.1461	0.000115608	0.000327477
LOXL1-AS1	1.37442	-0.402338	15.1333	0.000116366	0.000329403
AP002907.1	0.907591	-2.42412	14.9965	0.000124799	0.000351575
LINC02019	0.743386	-1.78301	14.8776	0.00013263	0.000371819
AC008764.2	0.834688	-1.22701	14.8341	0.000135617	0.000379437
AC015871.3	0.479301	0.734379	14.7987	0.000138097	0.000385781
HOXB-AS1	0.908706	-2.21619	14.7426	0.000142129	0.000395918
AC007881.4	1.06441	-2.01718	14.6663	0.000147795	0.000410224
OIP5-AS1	-0.310415	6.23895	14.5928	0.000153469	0.000424673
AL499602.1	1.41311	0.506738	14.4659	0.00016379	0.000450644
AC010245.2	0.47088	-1.2231	14.3699	0.000172065	0.000471096
AC016590.3	0.741615	-2.24992	14.3203	0.000176504	0.000482105
AC009090.6	0.910508	-1.08127	14.1374	0.000193902	0.000525217
LINC00997	0.389695	1.33974	13.9891	0.000209273	0.000563406
AP000757.1	1.49456	-1.9864	13.9746	0.000210841	0.000567384
NARF-IT1	0.9538	-3.02252	13.9683	0.000211527	0.00056911
AL031846.2	0.84929	-1.37512	13.7194	0.000240471	0.000639884
LINC01521	0.719762	-0.984545	13.7111	0.000241492	0.000642242
NCBP2-AS1	1.00117	-3.40049	13.6695	0.00024673	0.000654891
AC099522.2	0.683616	-1.31551	13.5982	0.000255975	0.000677397
LINC02038	1.37852	-2.27934	13.5684	0.000259936	0.000687162
CCNT2-AS1	0.499779	-0.345774	13.5389	0.000263936	0.000697012
AL158166.1	1.22299	-3.51324	13.4386	0.00027796	0.000731457
AC005070.3	0.545004	-1.7875	13.3755	0.000287169	0.000753244
PRKAR1B-AS2	2.33791	-1.28909	13.2213	0.000310991	0.000809981
AC109479.1	1.32095	-3.59048	13.2156	0.000311921	0.000812347
AP001330.4	0.639794	-2.15469	13.1761	0.000318347	0.000827102
AC021078.1	0.435477	1.93886	13.0893	0.000332978	0.000862291
UST-AS2	1.47722	-4.04693	13.0299	0.000343372	0.000886855
AC005104.1	0.864492	-2.41232	12.9933	0.000349942	0.000901927
WAC-AS1	0.30947	3.98854	12.9005	0.000367187	0.000942034
XPC-AS1	0.534057	-0.946648	12.6688	0.00041407	0.00105105
AL132639.2	0.781687	-1.6404	12.6266	0.000423255	0.00107222
AC061975.8	0.750951	-2.55311	12.567	0.000436568	0.00110272
AC092614.1	0.743218	-2.54375	12.5419	0.000442279	0.00111581
AC092295.2	0.495027	-0.615554	12.5003	0.000451962	0.00113828
ARHGAP5-AS1	0.502271	-0.0715663	12.4242	0.000470199	0.00117953
AL121895.2	1.25063	-3.21527	12.3721	0.000483109	0.00120881
AC138207.2	0.797102	-2.24024	12.3152	0.000497637	0.00124197
AL442125.2	1.13704	-3.63453	12.2745	0.000508284	0.00126547
AC124045.1	0.628136	-1.21768	12.1164	0.000551908	0.00136427
BNC2-AS1	1.48915	-3.77503	12.0618	0.000567855	0.00140041
AC069200.1	0.955237	-3.50243	12.0484	0.000571835	0.00140965
MACORIS	0.923113	-3.11968	11.8987	0.000618289	0.0015133
MAP3K4-AS1	0.644666	-1.35427	11.8616	0.000630372	0.00154032
AC138230.1	0.62478	-2.3168	11.8508	0.000633924	0.0015483
AP001107.9	0.559257	2.22051	11.7655	0.000662831	0.00161157
AL354989.1	0.9641	-3.53644	11.6742	0.000695221	0.00168333
ANKRD10-IT1	0.664189	0.629985	11.6506	0.000703836	0.00170105
AL360181.2	0.63435	-0.994629	11.5762	0.000731791	0.00176435
LINC00115	0.50132	-1.38236	11.5521	0.000741068	0.00178548
AC127521.1	-0.810687	-2.16329	11.5481	0.00074261	0.00178897
AP003721.3	0.837437	-2.54633	11.5242	0.000751973	0.00180923
ACBD3-AS1	0.95254	-3.55533	11.5206	0.000753384	0.0018124
AL606834.2	0.502454	-1.78322	11.4081	0.000799129	0.00191001
AP000813.1	0.683721	-1.76827	11.3847	0.000808961	0.00193121
AC092953.2	0.623702	-2.0987	11.3815	0.000810344	0.00193402
HCG15	0.907007	-2.12905	11.3504	0.000823643	0.00196269
AC002401.4	1.42028	-3.72231	11.2647	0.000861513	0.00204563
LINC01094	0.820224	-0.822581	11.2361	0.00087454	0.00207372
LINC00539	0.584955	-1.66166	11.1733	0.00090383	0.00213532
LINC02100	1.00256	-3.5057	11.0764	0.000951021	0.00223557
AC096586.2	0.732773	-3.08917	10.993	0.000993623	0.00232681
BX255925.1	0.745761	-1.81529	10.8004	0.00109962	0.00255178
U91328.3	0.845534	-2.80331	10.7911	0.00110498	0.00256268
AC011477.2	0.585216	-0.935185	10.7692	0.00111779	0.00258939
AL109614.1	0.946812	-3.29329	10.7557	0.00112578	0.00260677
AC022167.2	0.392528	-0.904523	10.6918	0.00116436	0.00268777
SMG7-AS1	0.433954	-1.59235	10.6593	0.00118443	0.00273013
AC021087.3	0.566925	-2.05678	10.5638	0.00124566	0.00285864
AL360270.1	0.510759	-0.981374	10.5544	0.00125182	0.00287189
AL645608.7	0.915969	-0.370097	10.5527	0.00125299	0.00287424
AC007546.1	0.7357	-3.14838	10.5039	0.00128567	0.00294371
LAMC1-AS1	0.975135	-3.18885	10.4943	0.00129217	0.00295665
AC108860.2	1.75945	-2.36242	10.334	0.00140635	0.00319199
AC004967.2	0.667992	-2.32951	10.3258	0.0014125	0.00320402
AC011477.1	0.616693	-0.925845	10.2313	0.00148487	0.00335181
AC004771.2	0.913602	-3.58599	10.2031	0.00150726	0.00339659
AC110611.1	0.508534	-1.66686	10.2011	0.00150882	0.00339928
LINC00852	0.428421	-1.29966	10.0453	0.00163864	0.00366436
AC008105.3	0.738911	-0.122676	9.98231	0.00169428	0.00377525
SNHG14	0.841255	4.60029	9.96676	0.00170831	0.00380363
AC083862.2	0.497836	1.07215	9.94639	0.00172687	0.00384226
MIAT	1.00035	0.46284	9.94294	0.00173004	0.00384874
AC011476.3	0.692715	-2.36221	9.90053	0.00176942	0.00392797
LINC00996	0.74675	-1.63814	9.83478	0.00183227	0.00405473
LINC00641	0.481678	1.09586	9.8222	0.00184455	0.00407836
AC132872.3	0.615455	-1.57016	9.78575	0.00188063	0.00415231
AC139768.1	0.392992	-0.831848	9.77197	0.00189445	0.00417945
AC066613.1	0.77144	-1.93616	9.58521	0.00209231	0.00457803
AL049840.4	0.60966	-2.75614	9.54507	0.00213751	0.00466834
AC067852.2	0.385505	1.27755	9.36041	0.00235863	0.00510209
AC000123.1	0.447173	-1.49822	9.29404	0.00244369	0.00526424
AC245060.2	0.950427	-3.24083	9.19445	0.00257723	0.00552907
AC006059.1	0.871074	-1.96953	9.19223	0.00258029	0.00553438
AC018690.1	0.451824	-1.72523	9.0184	0.00283178	0.00601795
AL662791.1	0.888049	-2.96491	9.00502	0.00285213	0.00605703
AL121839.2	1.00006	-0.191897	8.99119	0.00287334	0.00609799
AC116366.1	0.562941	-0.64501	8.96418	0.00291521	0.00617756
AC129510.1	0.758401	-3.2369	8.93799	0.00295642	0.00625619
JMJD1C-AS1	0.681668	-2.55594	8.92556	0.00297619	0.00629206
LINC01278	0.261467	3.772	8.92182	0.00298215	0.00630292
PINK1-AS	-0.30902	0.735199	8.87628	0.00305587	0.00643942
AC103974.1	0.815085	-3.12043	8.85746	0.00308687	0.0064979
AL354892.3	0.543478	-2.23021	8.7727	0.00323054	0.00676703
AP003392.1	0.660169	-2.17893	8.70523	0.00334975	0.00699173
AC131159.2	0.704463	-3.32909	8.63697	0.00347494	0.00722608
LINC02035	0.363072	1.56862	8.5724	0.00359776	0.00745665
AC004908.1	0.667814	-2.61763	8.50756	0.00372556	0.00770055
AC104695.2	0.7159	-2.40756	8.49505	0.00375074	0.00775008
AL137127.1	0.42185	-1.32651	8.37297	0.00400585	0.00822585
LINC00265	0.612153	-0.446946	8.3497	0.00405645	0.00832391
AC004585.1	0.920806	-1.46991	8.31564	0.00413169	0.00846553
AC022150.2	0.681302	-1.57887	8.29275	0.00418305	0.00855834
AC011462.5	0.403722	-1.30319	8.27996	0.00421205	0.00861072
DYRK3-AS1	0.691676	-3.0384	8.25748	0.00426349	0.00870747
AC090198.1	-0.359584	0.839646	8.23828	0.00430796	0.00878791
AC138028.6	0.637386	-2.78053	8.19182	0.00441748	0.00898917
AC116913.1	-0.259713	0.17463	8.04447	0.00478406	0.00966845
AC073896.3	0.47202	-1.86787	8.04462	0.00478367	0.00966845
AL031716.1	0.625748	-2.99092	7.99305	0.00491918	0.00991678
AC096733.2	0.489719	-1.42113	7.9288	0.00509354	0.0102325
LINC00957	0.508483	0.314188	7.88308	0.00522146	0.0104624
CD27-AS1	0.269333	2.63454	7.76698	0.00556123	0.0110745
AC005586.1	0.523754	-0.493746	7.76469	0.00556817	0.0110865
AC106037.2	0.857659	-3.36464	7.75091	0.00561001	0.011164
TRAPPC12-AS1	0.629408	-1.56563	7.70997	0.00573629	0.0113867
AC120114.1	0.615912	-1.7132	7.70863	0.00574047	0.0113938
AL022238.2	0.817921	-3.74718	7.70608	0.00574843	0.011409
PAN3-AS1	0.402841	-1.40515	7.59468	0.00610777	0.0120575
KDM2B-DT	0.65479	-3.28262	7.57677	0.00616766	0.0121644
AP002761.3	-0.671092	-2.30466	7.53794	0.00629954	0.0123988
AC005696.1	0.547783	-2.34336	7.47815	0.00650833	0.0127661
Z97989.1	0.355958	-1.12057	7.43723	0.0066553	0.0130215
TBC1D8-AS1	0.392081	-0.969989	7.38876	0.0068338	0.0133392
AC008760.1	0.742662	-2.77073	7.17739	0.00767151	0.0147871
LINC00654	0.676575	-0.0695125	7.0867	0.00806256	0.0154587
AC007638.2	0.506811	-0.557513	6.95618	0.00866164	0.0164861
BX322562.1	0.655181	0.0614066	6.89442	0.0089609	0.0169953
AC093620.1	0.654763	-3.2383	6.85927	0.00913594	0.0172894
HM13-IT1	0.509436	-2.82835	6.79118	0.00948508	0.0178773
AC009120.3	0.61744	-2.95747	6.56723	0.0107334	0.019973
NIPBL-DT	0.281996	2.02707	6.55761	0.0107906	0.0200677
AL121603.2	0.258893	0.175729	6.42529	0.0116111	0.0214343
AC006008.1	0.548537	-1.13599	6.26711	0.0126768	0.0231903
AC003070.1	0.741529	-3.40786	6.22788	0.0129564	0.0236529
AC096992.2	0.275767	-0.554398	6.11925	0.0137644	0.0249651
AC090589.3	0.443358	-1.53852	6.07847	0.014081	0.0254641
AL157932.1	0.609629	-3.3057	5.90901	0.0154794	0.0276855
AC090229.1	0.418798	-1.13248	5.86561	0.0158601	0.0282757
PSMA3-AS1	0.222326	4.36351	5.85982	0.0159116	0.0283583
AL022157.1	0.436481	-3.02245	5.85063	0.0159938	0.028494
Z68871.1	0.522185	-2.2056	5.72652	0.0171469	0.0303312
AC027702.1	0.641056	-2.53248	5.69686	0.0174351	0.030798
AP007216.2	-0.674109	-3.43489	5.69454	0.0174578	0.0308352
AC092354.2	0.382616	-2.27674	5.68882	0.017514	0.0309226
AC108134.3	0.333651	-0.759017	5.68176	0.0175836	0.0310325
AC073254.1	0.330717	-0.468613	5.65192	0.0178811	0.0315026
AC245041.1	-0.913896	-2.13481	5.64094	0.017992	0.0316686
SNHG15	0.412691	2.67396	5.45009	0.0200357	0.0348993
AC130371.2	-0.594069	-2.76582	5.25606	0.0223619	0.0385196
AC016590.2	0.67148	-3.88097	5.22972	0.0226987	0.0390273
AC009318.2	-0.272177	-1.16312	5.18183	0.0233245	0.0400057
KIF9-AS1	0.233497	-0.159465	5.15483	0.0236853	0.0405625
AL132989.1	0.423732	-1.42315	5.13988	0.0238876	0.0408776
TSPOAP1-AS1	0.391	-0.885405	5.0619	0.0249721	0.0425137
AC083799.1	-0.206401	2.16732	5.05159	0.0251193	0.0427298
AC022211.3	0.598131	-3.53145	4.86147	0.0280018	0.0471173
SEMA6A-AS1	0.380384	-1.77232	4.83489	0.0284316	0.0477455
AC118344.1	0.648779	-2.92656	4.80382	0.0289426	0.0484989
AC004241.3	0.36482	-2.15135	4.79795	0.0290402	0.0486538
LINC00863	0.249427	0.886821	4.77846	0.0293669	0.0491403
ITGB2-AS1	0.510007	0.0394223	4.77234	0.0294702	0.0493069
AC084824.4	0.391427	-2.15627	4.74959	0.0298577	0.0498763
AL031670.1	0.515719	-2.82516	4.73066	0.0301843	0.0503601
LINC00909	0.187619	2.33731	4.62399	0.0320955	0.0532314
THAP9-AS1	0.231119	3.24786	4.62323	0.0321095	0.0532454
FAM13A-AS1	0.332493	-0.485053	4.61623	0.0322393	0.0534421
AC053513.2	0.660672	-3.28379	4.55143	0.0334676	0.0552064
AC091185.1	0.56721	-3.29205	4.45382	0.0354113	0.0580412
AC026412.3	0.45983	-2.17967	4.42558	0.0359955	0.0588686
AC008608.2	0.338333	0.617727	4.35989	0.0373938	0.0608992
AL355353.1	0.431569	-0.276999	4.33529	0.0379321	0.0616676
AC018695.4	0.559512	-3.37291	4.25314	0.0397895	0.0644066
ITGB1-DT	0.673048	0.723658	4.25	0.0398623	0.0645109
AC067852.3	0.472121	-2.21913	4.1161	0.0431044	0.0691607
AC004067.1	0.460203	-2.79893	4.06523	0.0444079	0.0710515
AL096865.1	0.677018	-3.32502	4.05968	0.0445527	0.0712324
DUBR	0.414077	0.0777625	4.05336	0.044718	0.0714606
AL118506.1	0.222444	1.37598	4.01745	0.0456705	0.0728054
AC002128.2	0.558344	-3.31554	4.01248	0.0458039	0.0729661
AL121899.4	0.551358	-3.51373	3.99947	0.0461552	0.0734674
AC007406.3	0.403433	-1.72948	3.99093	0.0463874	0.0737937
AC008124.1	0.18645	2.59193	3.9483	0.0475649	0.0754714
AL731533.2	0.665222	-3.6474	3.94442	0.0476738	0.0756064
ACAP2-IT1	0.495505	-3.44295	3.90763	0.0487181	0.0770762
AC006026.3	0.547012	-3.03141	3.89614	0.0490492	0.0775356
AC111197.1	0.517541	-3.25382	3.87546	0.0496512	0.078349
AL049840.3	0.43851	-3.42678	3.79963	0.0519261	0.0815214
NNT-AS1	0.190493	3.45069	3.78795	0.0522864	0.0820588
AL603839.2	0.298634	-2.2256	3.77037	0.0528334	0.0828296
AC012313.5	0.368244	-0.927552	3.66102	0.056376	0.087726
LINC01515	0.306798	1.20323	3.59624	0.0585935	0.0907536
MIR155HG	0.462391	-0.965234	3.54963	0.0602462	0.0929542
LINC02361	0.4581	-1.29078	3.54362	0.0604627	0.0932428
AL139407.1	0.437101	-2.84876	3.54022	0.0605857	0.0934084
AC073487.1	0.468267	-3.25451	3.52508	0.0611367	0.0941793
AC093297.2	0.177946	2.83412	3.47825	0.0628744	0.0965453
AC010320.3	0.485082	-3.70874	3.46156	0.0635067	0.0974083
AC005034.5	-0.335353	-2.46091	3.40115	0.0658519	0.100564
AC124319.1	0.541975	-3.26237	3.38666	0.0664283	0.101326
AP006621.4	0.53552	-3.16268	3.35939	0.0675275	0.102817
SENCR	0.330844	-1.26138	3.28878	0.0704653	0.10668
MAP3K14-AS1	0.275495	-0.16139	3.10727	0.0786677	0.117574
AL133243.3	-0.200605	-1.35865	3.09772	0.0791265	0.118157
AP001893.1	0.514955	-3.77641	3.06658	0.0806442	0.120146
PSMD6-AS2	0.373021	-2.13202	3.04251	0.0818387	0.121687
AL731567.1	0.582926	-3.14079	2.98449	0.0847976	0.125538
LINC01106	0.437524	-1.61333	2.9783	0.0851202	0.125962
AC022558.3	0.416846	-3.53309	2.94981	0.0866214	0.127914
BACH1-IT1	0.322818	-2.64754	2.83831	0.0927808	0.135908
MIR222HG	0.344666	-0.42957	2.82405	0.0936023	0.136921
ACVR2B-AS1	-0.211899	0.0205112	2.72373	0.0996109	0.144616
CHASERR	0.178579	3.84203	2.69868	0.101176	0.146603
AL049796.1	0.229382	-1.93664	2.68499	0.102043	0.147736
AC245100.6	0.478369	-3.61321	2.66204	0.103515	0.149616
ZNF561-AS1	0.141482	1.5261	2.64466	0.104645	0.15098
AC020916.1	-0.315614	2.04891	2.63265	0.105434	0.151905
AC121757.1	-0.554374	-3.62971	2.61877	0.106354	0.153063
SERPINB9P1	0.415545	1.31479	2.60711	0.107133	0.154004
AC073508.3	0.24396	-1.71467	2.5375	0.11192	0.160135
AC090907.1	0.464534	-3.08145	2.49275	0.115121	0.164093
NUTM2A-AS1	0.144377	3.27402	2.48017	0.116039	0.165208
AC073046.1	0.36109	-2.53879	2.46618	0.11707	0.166503
CHROMR	0.215982	1.04067	2.4611	0.117447	0.166951
TAPT1-AS1	0.201777	-0.328375	2.39007	0.122858	0.17358
AC090587.1	0.318546	-2.90064	2.31811	0.128625	0.180601
AC079921.1	0.244107	-1.26015	2.3025	0.129915	0.18207
AL049840.2	0.271992	-0.875196	2.25761	0.133707	0.186725
AC019254.1	0.396285	-3.49302	2.25744	0.133722	0.186738
AC087289.5	0.314898	-1.64563	2.24055	0.135181	0.188541
AP001318.2	-0.154031	0.518388	2.17108	0.141373	0.195978
NPTN-IT1	0.424084	-2.32146	2.16042	0.142351	0.197221
AC011450.1	0.246593	-0.957798	2.1052	0.147543	0.2034
RBPMS-AS1	0.259418	-0.315699	2.07132	0.150833	0.20737
PAXIP1-AS2	-0.181382	2.38082	1.97479	0.160676	0.219217
CENATAC-DT	0.208503	-0.350265	1.96126	0.162114	0.220996
AP000866.1	-0.214719	0.247613	1.96084	0.162159	0.221033
AC080162.1	0.334503	-3.56266	1.94778	0.16356	0.222601
MALINC1	-0.149296	0.463808	1.9424	0.164142	0.223249
AC016705.2	0.605063	-0.783323	1.9353	0.164913	0.224121
BOLA3-AS1	0.278598	-0.915719	1.9071	0.168017	0.227746
AC110611.2	0.260066	-1.49186	1.90695	0.168034	0.227753
AC018645.3	0.152673	-0.0507148	1.88212	0.170822	0.230891
AGAP2-AS1	0.343117	-2.18567	1.86113	0.173222	0.233758
BET1-AS1	0.198452	-2.17492	1.84056	0.175611	0.236566
AC022364.1	-0.181327	-0.10307	1.80868	0.17939	0.24088
MAP4K3-DT	-0.128739	3.50017	1.80033	0.180395	0.242016
USP46-DT	0.157799	0.176118	1.75093	0.186476	0.249016
AC097448.1	-0.105511	2.74608	1.73283	0.188764	0.251572
AC046143.2	0.273865	-2.51254	1.71282	0.191332	0.254484
AL136169.1	0.251583	-1.28484	1.70882	0.191851	0.255093
ALG13-AS1	0.372012	-3.67537	1.6861	0.194826	0.258452
UBA6-AS1	-0.113351	2.3771	1.68279	0.195263	0.258943
ZNF674-AS1	-0.126525	1.07222	1.64218	0.20073	0.265148
MIR3936HG	0.168675	1.09779	1.60058	0.206519	0.27189
AC087500.1	0.182236	-1.27318	1.59136	0.207829	0.273387
PCED1B-AS1	0.265526	1.3387	1.5801	0.209441	0.27528
AC108479.1	0.279026	-1.1849	1.55034	0.213777	0.280194
BX470102.2	0.215895	-0.824804	1.51579	0.218943	0.286051
AL122035.1	0.260952	-3.08177	1.49692	0.221828	0.289279
AC138207.5	-0.189497	-0.540453	1.48063	0.224356	0.29211
UBL7-AS1	0.110528	0.441657	1.44596	0.229852	0.298336
AC018521.6	-0.198247	-2.35734	1.41772	0.234449	0.303341
LINC01150	0.274029	-2.66893	1.3435	0.247073	0.317216
AL357874.3	0.162039	-1.33784	1.31457	0.252219	0.322876
AL353748.3	0.190507	-1.06232	1.27656	0.259182	0.330422
AC145098.1	0.278818	-3.1458	1.27167	0.260094	0.33143
AC138207.4	-0.178255	-1.18523	1.23223	0.267606	0.339445
AC020910.5	-0.155469	0.0469372	1.23049	0.267944	0.339773
AC116351.1	0.460878	-0.139631	1.1791	0.27816	0.350892
RARA-AS1	0.136419	0.726197	1.08121	0.299023	0.373092
ADNP-AS1	0.110853	-0.992532	1.06661	0.302305	0.376496
AP001922.6	0.239928	-3.4209	1.03441	0.309707	0.384332
AC108010.1	0.252458	-1.4349	1.01641	0.31395	0.388798
AC093227.1	0.188937	-2.43349	0.9818	0.322323	0.397486
AC016735.1	0.398244	-1.06227	0.961152	0.327459	0.402854
AL157871.2	0.264158	-3.60266	0.921109	0.337734	0.413557
AL035587.2	0.161505	-0.496735	0.850353	0.35698	0.433539
L3MBTL4-AS1	-0.187798	-2.39655	0.841109	0.359604	0.436003
AC060766.4	0.175683	-1.46798	0.802882	0.370744	0.447657
LINC00663	0.106635	0.301052	0.797524	0.372344	0.449203
LINC01023	0.148161	0.644581	0.78056	0.377473	0.454412
AC107027.3	0.0902202	0.268844	0.770007	0.380714	0.457764
AC087521.3	0.175632	-2.89407	0.745797	0.388301	0.465386
EBLN3P	-0.0795145	5.20748	0.711062	0.399569	0.476805
MBNL1-AS1	-0.109956	-0.3963	0.684513	0.408505	0.485777
AC095055.1	-0.145478	-2.26974	0.627064	0.428879	0.506195
TMEM99	0.119491	3.39877	0.601984	0.438257	0.515057
NORAD	-0.0514033	7.51992	0.601731	0.438353	0.51514
AC005498.3	0.168101	-1.95455	0.576139	0.448253	0.524798
AC245041.2	0.324344	-0.0190367	0.56163	0.454022	0.530442
AC021016.1	-0.0791959	-0.139627	0.543782	0.46128	0.537667
SNHG16	0.073932	3.72616	0.491464	0.483662	0.558963
NUTM2B-AS1	0.0618229	2.47669	0.468327	0.494134	0.569062
AP001625.2	0.194855	-3.36167	0.467004	0.494744	0.569609
AC010503.4	0.109075	3.37239	0.463598	0.496321	0.57101
AC007406.4	-0.0668831	1.73626	0.461372	0.497356	0.571959
CLCA4-AS1	-0.220727	-4.33336	0.437058	0.508907	0.582707
AL133243.2	0.0823612	-0.240137	0.431725	0.511502	0.585187
AC112220.2	-0.067948	1.02012	0.427716	0.513468	0.58703
AC026979.4	-0.0991493	-1.32737	0.4202	0.51719	0.590664
WAKMAR2	-0.0754727	-0.20483	0.40702	0.523832	0.596942
STARD4-AS1	0.150046	0.426804	0.391255	0.531979	0.604796
AC005479.2	0.15673	-3.4368	0.375154	0.540538	0.613025
BX842570.1	0.119089	-0.751263	0.356864	0.550574	0.622201
AL139260.1	0.105945	-1.1109	0.351785	0.553422	0.624623
AP001922.5	0.148512	-3.45056	0.342485	0.558711	0.629584
LINC00662	0.0509483	2.53633	0.323358	0.569899	0.640012
Z69706.1	-0.0886824	-1.82875	0.278843	0.597738	0.664765
AL049840.6	0.106825	-3.18893	0.271258	0.602762	0.669403
TFAP2E-AS1	-0.103353	-2.58139	0.267835	0.605059	0.671357
INE1	0.0606185	-1.19452	0.252609	0.615506	0.680984
AC060766.7	0.108082	-2.36123	0.249414	0.617749	0.683147
AC087672.2	0.143607	-3.40131	0.248835	0.618157	0.683578
AC114980.1	-0.0661888	-1.53568	0.240959	0.62377	0.688585
AC046143.1	-0.0756683	-2.10677	0.224109	0.636172	0.699476
FLJ20021	0.0608713	1.6117	0.209932	0.647057	0.70958
AC009318.3	-0.0610253	-1.82534	0.200466	0.654575	0.716215
AC084357.2	0.0968502	-3.35064	0.197873	0.656671	0.718178
IQCH-AS1	-0.0404299	2.27812	0.164048	0.685662	0.742968
AC068792.1	0.0696092	-2.51008	0.15995	0.689405	0.74617
AP002449.1	-0.0780872	-2.84206	0.134974	0.713514	0.767164
AC130650.2	0.0636902	-2.03296	0.130062	0.718548	0.771487
AL732509.1	-0.0378435	0.179056	0.128351	0.720327	0.773114
ATP1A1-AS1	0.0350986	1.79605	0.12007	0.729131	0.780648
AC104530.1	0.0694123	-1.07774	0.109194	0.741227	0.791396
AP005899.1	0.0754285	-2.61835	0.106528	0.744294	0.793867
AL050343.2	0.0586122	-2.5258	0.0969178	0.755714	0.803844
AC008906.1	-0.0463059	-1.82766	0.0788615	0.778984	0.82353
AC004112.1	0.0594346	-2.85995	0.0690968	0.792785	0.834731
AP003774.2	0.0683824	-3.33734	0.0630152	0.801914	0.842856
HOTAIRM1	0.0462205	-2.15525	0.056339	0.812494	0.851601
AF131215.5	-0.0666301	-1.61325	0.0503404	0.822581	0.860136
AP005136.3	-0.0380116	-2.72002	0.0463254	0.829689	0.86607
TP53TG1	0.0341392	3.0108	0.0385742	0.844389	0.878448
AC005332.6	0.0147547	3.93179	0.032686	0.856617	0.888236
SMARCA5-AS1	-0.0448993	-3.08775	0.0301944	0.862133	0.892858
IL10RB-DT	-0.0168468	-0.303974	0.0263051	0.871235	0.900059
AC005332.7	0.0421186	-3.43984	0.026042	0.871875	0.900647
AL391121.1	0.0189448	0.389312	0.0153375	0.901497	0.924746
AL355490.1	0.0236075	-2.62362	0.0132183	0.908523	0.930399
AC084824.3	0.0153254	-2.65738	0.00884087	0.925133	0.943348
AC004803.1	-0.0118501	-0.229757	0.0087589	0.92548	0.94355
FGD5-AS1	-0.00720372	6.29342	0.00727065	0.932089	0.948459
AL391834.2	-0.0074054	-1.08546	0.00389558	0.950262	0.962658
LINC01560	0.00526559	-0.157867	0.00286957	0.957304	0.968036
AC008770.3	-0.00963878	-2.83444	0.00180725	0.966111	0.974353
AL109936.9	-0.002304	-3.05553	0.000114317	0.991474	0.993301
