# Supplementary material for: A novel disulfidptosis-related lncRNAs signature for predicting survival and immune response in hepatocellular carcinoma
Source: Aging (Albany NY). 2024 Jan 4;16(1):267–84. doi: 10.18632/aging.205367 (PMC10817373; doi:10.18632/aging.205367)
Supplement: Supplementary Table 2 [file aging-16-205367-s003.xlsx]

## Sheet: Sheet1
Supplementary Table 2. The results of univariate regression analysis in the training cohort.
LncRNA	HR	HR.95L	HR.95H	P value
AL031985.3	2.05757	1.54928	2.73261	6.22379e-07
MKLN1-AS	2.72192	1.77361	4.17727	4.60397e-06
AL355574.1	2.23368	1.58203	3.15374	4.96301e-06
DDX11-AS1	3.31934	1.9196	5.73976	1.75644e-05
AL603839.2	2.3122	1.55436	3.43953	3.52279e-05
AC108752.1	1.45278	1.21104	1.74279	5.77288e-05
AC107959.3	1.47865	1.22073	1.79107	6.34982e-05
WAC-AS1	1.81429	1.35238	2.43397	7.08193e-05
AL442125.2	2.17727	1.47655	3.21051	8.61017e-05
NRAV	1.74777	1.31804	2.31761	0.000105368
AC011352.3	1.95052	1.38452	2.74792	0.000133194
JMJD1C-AS1	2.74807	1.6292	4.63531	0.000150781
AC022007.1	1.87218	1.34662	2.60287	0.000191411
AC026356.1	1.99327	1.38215	2.87459	0.00022208
RNF216P1	2.05283	1.40012	3.00984	0.000229823
AC006252.1	2.19902	1.4403	3.35741	0.000262372
MIR4435-2HG	2.15438	1.42613	3.25451	0.000265929
AL158166.1	1.77779	1.30375	2.42419	0.000276567
AL117335.1	1.64668	1.25641	2.15819	0.000301727
CYTOR	1.72106	1.28199	2.3105	0.000302565
AC005479.2	2.38676	1.47599	3.85952	0.000388605
AL021392.1	2.28605	1.44528	3.61593	0.000408869
MCM3AP-AS1	3.44884	1.73328	6.8624	0.000420617
CDKN2A-DT	2.85882	1.58712	5.14949	0.000468062
AL928654.1	1.79042	1.28914	2.48663	0.000510067
AL137127.1	3.41156	1.70332	6.83298	0.00053465
AC027097.1	2.08107	1.37108	3.15872	0.000576783
AL442125.1	3.539	1.70831	7.33153	0.000671387
PICSAR	1.44166	1.16762	1.78002	0.000672284
ZEB1-AS1	1.69964	1.24873	2.31337	0.000745902
AC048344.4	2.23444	1.40006	3.56606	0.000749286
AC012467.2	1.86188	1.2946	2.67773	0.000800556
POLH-AS1	1.98078	1.31997	2.97241	0.000965102
AC020915.2	1.79088	1.26684	2.53168	0.000969903
AL590705.3	1.7011	1.24003	2.3336	0.000988618
AL358472.4	1.67286	1.23105	2.27323	0.00100718
SNHG3	1.36363	1.13276	1.64155	0.00104885
AC016065.1	1.91811	1.29899	2.83232	0.0010551
AL356481.1	3.73523	1.69536	8.22949	0.00107622
C2orf27A	1.96714	1.30915	2.95583	0.0011278
AC026401.3	1.4049	1.14474	1.7242	0.00113939
MAPKAPK5-AS1	1.65115	1.21637	2.24134	0.00129909
AC004816.1	1.53889	1.18126	2.0048	0.00140121
HMGN3-AS1	1.80037	1.24479	2.60392	0.00179047
TBC1D8-AS1	2.00576	1.29521	3.10612	0.00181338
LINC01094	1.95572	1.28251	2.98232	0.00183484
LINC00205	1.55634	1.17827	2.05574	0.00183765
LINC00862	1.57197	1.18169	2.09115	0.00189317
AC012640.1	1.52644	1.16783	1.99516	0.00196455
AC016747.1	1.65564	1.20204	2.2804	0.00202548
AL139260.1	1.8831	1.25613	2.823	0.00218517
AC010969.2	1.71308	1.21289	2.41954	0.00224662
ACVR2B-AS1	1.89228	1.25683	2.84902	0.00225134
AC022211.3	2.0748	1.29809	3.31627	0.00228622
TRAF3IP2-AS1	2.79067	1.44205	5.40054	0.00231374
AC073842.2	1.68654	1.20421	2.36205	0.00235663
PRKAR1B-AS2	1.19777	1.06569	1.34622	0.00246786
AC026412.3	2.27073	1.33007	3.87666	0.0026544
GHRLOS	3.82285	1.58462	9.22254	0.00284047
LINC02709	1.70445	1.2005	2.41996	0.00286553
AC051635.1	1.41846	1.12638	1.78627	0.00296163
AC100861.1	1.83116	1.22442	2.73857	0.00322001
TMCO1-AS1	1.95374	1.25067	3.05204	0.00325276
AC026356.2	2.59666	1.37026	4.92069	0.00343553
ZBTB11-AS1	1.96482	1.24953	3.08959	0.0034492
AC009549.1	1.39231	1.11445	1.73945	0.00356725
AL357079.1	1.81759	1.21608	2.71662	0.00356773
ZNF337-AS1	2.06439	1.26491	3.36918	0.00372852
AC116351.1	1.29463	1.0871	1.54178	0.00376918
AC005332.5	1.51464	1.143	2.00713	0.00384687
BACE1-AS	1.9238	1.23303	3.00155	0.00393975
AC046143.2	1.40691	1.11531	1.77475	0.0039656
AL606489.1	1.35951	1.10267	1.67618	0.00404343
AC020915.1	1.69282	1.18219	2.424	0.00405763
AC138150.2	2.1429	1.27318	3.60674	0.00411554
AC083855.2	1.35867	1.10129	1.67619	0.00423105
AL592148.3	2.13761	1.26756	3.60485	0.0043832
LINC01515	2.65085	1.35226	5.19647	0.0045298
HCG15	1.6938	1.17608	2.43944	0.0046353
AC040970.1	1.34194	1.09442	1.64545	0.00469483
GIHCG	1.48272	1.12792	1.94912	0.0047636
SBF2-AS1	1.63791	1.16078	2.31117	0.00497568
AC018690.1	1.70197	1.16918	2.47755	0.00550559
UNC5B-AS1	1.81996	1.19219	2.77831	0.00552992
LINC01011	1.68534	1.16258	2.44317	0.00586711
AC138028.6	1.98111	1.21614	3.22726	0.00603437
AC006504.5	2.55409	1.29551	5.03536	0.00677856
AC016705.2	1.50125	1.11771	2.01642	0.00694952
AC008875.1	1.68402	1.15166	2.46247	0.00718201
AL024498.1	2.74048	1.31044	5.73107	0.00740169
THUMPD3-AS1	1.62556	1.139	2.31995	0.00742524
AP000866.2	1.77971	1.16622	2.71593	0.00751855
AC005670.3	2.08457	1.21406	3.57926	0.00773958
AC011921.1	2.10088	1.21474	3.63347	0.00790897
AC092910.3	1.80657	1.16586	2.79938	0.0081281
AL355388.1	1.89688	1.18061	3.04769	0.00813939
NCK1-DT	2.67125	1.2898	5.53233	0.00816788
AC098484.4	1.97583	1.19214	3.27469	0.00824771
AC018904.1	1.38284	1.0863	1.76031	0.00848327
AC083799.1	1.52533	1.11264	2.09109	0.00871401
AL499602.1	1.21587	1.05059	1.40714	0.00874037
AC004943.2	1.75908	1.15014	2.69043	0.00918263
SNHG17	1.46744	1.0994	1.95869	0.00923605
AL133243.2	1.6576	1.13255	2.42608	0.00931052
AL031670.1	1.76286	1.14845	2.70598	0.00951375
AC074117.1	1.51893	1.10741	2.08339	0.00952075
AL049840.5	1.45741	1.09453	1.9406	0.00992978
AC004923.4	1.62634	1.12315	2.35497	0.0100283
LENG8-AS1	1.48055	1.09776	1.99681	0.0101376
AL049840.3	2.37768	1.22821	4.60294	0.0101738
AC061975.8	2.23442	1.20905	4.12935	0.0102934
ZNF32-AS1	1.66371	1.12756	2.45481	0.0103219
LINC01615	1.4586	1.09269	1.94704	0.0104226
AL355488.1	1.34624	1.07145	1.69151	0.0106966
CENATAC-DT	1.46069	1.09141	1.95491	0.0108273
AP001372.2	1.60298	1.11471	2.30511	0.0109002
ZNF529-AS1	1.61384	1.11386	2.33825	0.0114069
LINC01772	2.71288	1.23841	5.94288	0.0126171
UBA6-AS1	2.02866	1.16258	3.53995	0.0127637
AC006026.3	1.34112	1.0641	1.69026	0.0129095
AC022150.4	1.48126	1.08661	2.01925	0.0129412
AC026801.2	1.53537	1.09347	2.15586	0.0132879
AC107068.1	1.70043	1.11492	2.59342	0.0136985
ARHGAP5-AS1	1.56025	1.09449	2.22423	0.0139309
ATP1A1-AS1	1.765	1.12114	2.77863	0.0141352
AP001453.2	2.20709	1.1713	4.15882	0.014321
FBXL19-AS1	1.45386	1.07648	1.96353	0.014663
AC112220.2	1.62684	1.10041	2.4051	0.0147015
AC004812.2	1.56795	1.09157	2.25223	0.0149272
AC007773.1	1.36513	1.06239	1.75413	0.0149718
NRSN2-AS1	1.64803	1.10191	2.4648	0.014995
AC018529.2	2.99024	1.23062	7.26586	0.0156024
AC091057.1	1.52428	1.08264	2.14606	0.0157408
AC083862.2	1.31735	1.05303	1.64801	0.0158555
MAP3K4-AS1	1.58422	1.08982	2.3029	0.0159256
TRAPPC12-AS1	1.41209	1.06625	1.8701	0.01606
AC010173.1	1.89135	1.1257	3.17777	0.016075
GPRC5D-AS1	1.64191	1.09545	2.46097	0.0163294
AC102953.2	1.42899	1.06775	1.91244	0.0163577
AP002449.1	1.59874	1.08965	2.34567	0.0164431
AL035461.2	1.29832	1.04882	1.60717	0.0164952
AC007998.3	1.85811	1.11754	3.08943	0.0169228
SNHG1	1.31563	1.04997	1.64851	0.0171417
AC093673.1	1.32171	1.05051	1.66293	0.0172896
AC084357.2	1.63188	1.08946	2.44436	0.0175208
AL021707.2	2.14139	1.13867	4.02712	0.0181308
AC021087.3	2.34967	1.15402	4.78412	0.0185312
AC002398.1	1.49422	1.06769	2.09113	0.0191841
LINC00622	1.40718	1.05694	1.87347	0.0193265
AC092614.1	1.72724	1.09082	2.73497	0.0197698
NIFK-AS1	1.5724	1.07443	2.30118	0.0198365
AC003086.1	1.56497	1.07306	2.28238	0.0200068
SNHG12	1.35867	1.04862	1.7604	0.0203837
AC010327.6	1.6132	1.07661	2.41722	0.0204638
ZFAS1	1.31553	1.04159	1.66152	0.0213339
AC004801.6	1.73697	1.08497	2.78078	0.0214695
AP001505.1	1.24868	1.03103	1.51228	0.0230475
LINC01836	1.22162	1.02779	1.45202	0.0231549
SNHG16	1.41442	1.04852	1.908	0.0231953
AC012360.3	1.63396	1.06918	2.4971	0.0232638
RBPMS-AS1	1.40986	1.04732	1.89789	0.0235252
CCNT2-AS1	1.92797	1.09188	3.40428	0.0236366
AC073254.1	2.10386	1.10141	4.01872	0.0242925
CCDC18-AS1	1.39105	1.0435	1.85437	0.0244339
AC120114.1	1.6895	1.06827	2.672	0.024939
DYRK3-AS1	2.15545	1.10041	4.22203	0.0251623
FAM111A-DT	1.47813	1.04954	2.08172	0.0253025
AC127024.4	1.48498	1.04938	2.10138	0.0256097
ITGB1-DT	1.21809	1.02377	1.4493	0.0260901
AC244033.2	1.44493	1.0445	1.99889	0.0262236
AL136169.1	1.63003	1.05834	2.51055	0.0266046
AC023043.4	1.28806	1.02957	1.61144	0.0267658
AP001469.2	1.74469	1.0642	2.86033	0.0273391
CLCA4-AS1	1.65783	1.05753	2.59888	0.027536
NDUFB2-AS1	2.50822	1.10652	5.68552	0.0276378
AC093227.1	2.08368	1.0818	4.01342	0.02816
CH17-340M24.3	1.29571	1.02802	1.63309	0.0282317
LINC01978	1.74858	1.0601	2.88421	0.0286303
AL122035.1	1.65077	1.05194	2.59049	0.0292408
AC108463.2	1.73151	1.05657	2.83761	0.0293831
AC011462.5	1.86655	1.06092	3.28396	0.0303785
SCAMP1-AS1	1.57537	1.0435	2.37834	0.0305757
AC016735.1	1.13349	1.01129	1.27044	0.0313268
LINC01775	1.67115	1.04582	2.67038	0.031769
LINC00662	1.89431	1.05189	3.4114	0.0332946
DUBR	1.7691	1.04186	3.00398	0.0347064
BX470102.2	1.68682	1.03725	2.74317	0.0350864
ASH1L-AS1	1.4044	1.02396	1.92619	0.0351286
AC131159.2	2.20113	1.05588	4.58856	0.0352883
NOP14-AS1	1.56083	1.03038	2.36437	0.0356241
AC010245.2	1.66008	1.03436	2.66432	0.0357357
ZNF32-AS2	1.52272	1.02842	2.25462	0.0357385
SNHG15	1.27007	1.01584	1.58792	0.0359168
AL078644.1	1.58886	1.03017	2.45056	0.0362229
LYRM4-AS1	1.51681	1.02709	2.24002	0.0362296
LAMC1-AS1	1.4487	1.02378	2.04999	0.03638
AC010186.3	1.45346	1.02386	2.06331	0.0364481
U91328.3	1.49283	1.02558	2.17296	0.0364527
TRIM52-AS1	1.35502	1.01653	1.80622	0.0382855
WARS2-AS1	1.47946	1.02121	2.14335	0.0383662
PSMD6-AS2	2.27167	1.04053	4.95946	0.0394276
AC005586.1	1.35897	1.01458	1.82026	0.0396829
MRPS30-DT	1.49165	1.01843	2.18476	0.0400015
PRKCZ-AS1	1.49533	1.01849	2.19541	0.0400258
AC006008.1	1.34296	1.01238	1.78149	0.0408246
AC025171.2	1.42008	1.01413	1.98852	0.0411843
LINC00294	1.40258	1.01349	1.94105	0.0412727
NUTM2B-AS1	1.85801	1.02248	3.37631	0.0420605
LINC00839	1.32978	1.00956	1.75155	0.0425924
AC087294.1	2.24669	1.02436	4.92759	0.043381
AC069234.5	1.497	1.0106	2.21749	0.0441601
AC011815.1	1.55831	1.01016	2.40391	0.0448925
Z98200.1	1.47452	1.00744	2.15815	0.0457073
UST-AS2	1.37007	1.00557	1.86668	0.0460232
LINC00654	1.51973	1.00613	2.29552	0.0467003
ZNF561-AS1	1.8333	1.00698	3.3377	0.0473997
UCKL1-AS1	1.99524	1.00761	3.95092	0.0475113
AC022150.2	1.28255	1.00051	1.64408	0.0495272
